1 **Structural basis for late maturation steps of the human mitoribosomal large subunit**

2

3

4 **Authors:** Miriam Cipullo<sup>1,2,†</sup>, Genís Valentín Gesé<sup>3,†</sup>, Anas Khawaja<sup>1,2</sup>,

5 B. Martin Hällberg<sup>3,4,\*</sup>, Joanna Rorbach<sup>1,2,\*</sup>

6

7

8 **Affiliations:**

9 <sup>1</sup> Department of Medical Biochemistry and Biophysics, Division of Molecular Metabolism,  
10 Karolinska Institutet, Solnavägen 9, 171 65 Solna, Sweden

11 <sup>2</sup> Max Planck Institute Biology of Ageing - Karolinska Institutet Laboratory, Karolinska  
12 Institutet, Stockholm, Sweden

13 <sup>3</sup> Department of Cell and Molecular Biology, Karolinska Institutet, Solnavägen 9, 171 65  
14 Solna, Sweden

15 <sup>4</sup> Centre for Structural Systems Biology (CSSB) and Karolinska Institutet VR-RÅC,  
16 Notkestrasse 85, 22607 Hamburg, Germany.

17

18

19 †Joint First Authors

20

21 \*Correspondence to:

22 B. Martin Hällberg

23 Address: Department of Cell and Molecular Biology, Karolinska Institutet, Solnavägen 9, 171  
24 65 Solna, Sweden

25 Email: martin.hallberg@ki.se

26

27 Joanna Rorbach

28 Department of Medical Biochemistry and Biophysics, Research Division of Molecular  
29 Metabolism, Karolinska Institutet, Solnavägen 9, 171 65 Solna, Sweden

30 Email: joanna.rorbach@ki.se

31

32

33

34

35 **Abstract**

36 Mitochondrial ribosomes (mitoribosomes) synthesize a critical set of proteins essential for  
37 oxidative phosphorylation. Therefore, their function is vital to cellular energy supply and  
38 mitoribosomal defects give rise to a large and diverse group of human diseases <sup>1</sup>. The  
39 architecture of mitoribosomes is strikingly different from that of their bacterial and eukaryotic  
40 cytosolic counterparts and display high divergence between species <sup>2-6</sup>. Mitoribosome  
41 biogenesis follows distinct molecular pathways that remain poorly understood. Here, we  
42 determined the cryo-EM structures of mitoribosomes isolated from human cell lines with  
43 either depleted or overexpressed mitoribosome assembly factor GTPBP5. This allowed us to  
44 capture consecutive steps during mitoribosomal large subunit (mt-LSU) biogenesis that  
45 involve normally short-lived assembly intermediates. Our structures provide important  
46 insights into the last steps of 16S rRNA folding, methylation and peptidyl transferase centre  
47 (PTC) completion, which require the coordinated action of nine assembly factors. We show  
48 that mammalian-specific MTERF4 contributes to the folding of 16S rRNA, allowing 16S  
49 rRNA methylation by MRM2, while GTPBP5 and NSUN4 promote fine-tuning rRNA  
50 rearrangements leading to PTC formation. Moreover, our data reveal an unexpected role for  
51 the elongation factor mtEF-Tu in mt-LSU assembly, in which mt-EF-Tu interacts with  
52 GTPBP5 in a manner similar to its interaction with tRNA during translational elongation.  
53 Together, our approaches provide detailed understanding of the last stages of mt-LSU  
54 biogenesis that are unique to mammalian mitochondria.

55  
56  
57  
58  
59  
60  
61  
62  
63  
64  
65  
66  
67  
68

69 **Main**

70 Mammalian mitoribosomes assemble in a multi-step process that includes the maturation of  
71 two ribosomal RNAs (rRNAs; 12S and 16S), a structural tRNA, and incorporation of 82  
72 mitoribosomal proteins (MRPs)<sup>7</sup>. Multiple assembly factors, many specific to mammalian  
73 mitochondria, assist in the mitoribosome assembly process. A growing number of studies in  
74 recent years have shown that a family of GTP-binding proteins (GTPBPs) is crucial for  
75 mammalian mitoribosome assembly<sup>8-13</sup>. Among these GTPBPs, GTPBP5 participates in the  
76 late steps of large subunit (mt-LSU) maturation, and its deletion leads to severe translational  
77 defects<sup>8,11</sup>.

78 To understand the molecular basis for the late stages of human mitochondrial mt-LSU  
79 assembly, we used single-particle electron cryomicroscopy (cryo-EM) to determine the  
80 structure of an mt-LSU intermediate isolated from GTPBP5-deficient cells (GTPBP5<sup>KO</sup>). In  
81 addition, we determined the cryo-EM structure of a GTPBP5-bound mt-LSU intermediate  
82 immunoprecipitated from cells expressing a tagged variant of GTPBP5 (GTPBP5<sup>IP</sup>).

83

84 **Composition of the GTPBP5<sup>KO</sup> and GTPBP5<sup>IP</sup> mt-LSU assembly intermediates**

85 Both the GTPBP5<sup>KO</sup> and GTPBP5<sup>IP</sup> mt-LSU assembly-intermediates reveal several  
86 trapped assembly factors: the MTERF4-NSUN4 complex, MRM2, MTG1 and the  
87 MALSU1:LOR8F8:mt-ACP module (Fig. 1a,b, Extended Data Fig. 1 and 2). Furthermore, the  
88 GTPBP5<sup>IP</sup> mt-LSU structure features GTPBP5 and the mitochondrial elongation factor mtEF-  
89 Tu (Fig. 1b, Extended Data Fig. 2). Comparing the GTPBP5<sup>KO</sup> and the GTPBP5<sup>IP</sup> mt-LSU  
90 intermediates with the mature mt-LSU<sup>14</sup> reveals two crucial differences in the 16S rRNA  
91 conformation (Fig. 1c,d). First, in both GTPBP5<sup>KO</sup> and GTPBP5<sup>IP</sup> intermediates, MTERF4 in  
92 the MTERF4-NSUN4 complex, binds an immaturely folded region of the 16S domain IV.  
93 This region (C2548-G2631) – corresponding to helices H68, H69, and H71 of the mature mt-  
94 LSU – is folded into a novel intermediate rRNA helical structure, hereafter denoted helix-X  
95 (Fig. 1). The helix-X occupies a different position on the mt-LSU than H68-71 in the mature  
96 mt-LSU, where helices H68-71 and H89-90 jointly form the peptidyl-transferase centre (PTC)  
97 (Fig. 1d). MTERF4s binding of helix-X partly orders the disordered rRNA in the mt-LSU  
98 assemblies' subunit interface side (Extended Data Fig. 1) and thereby enables MRM2 to bind  
99 (Fig. 1d). Second, in the GTPBP5<sup>KO</sup> – but not in the GTPBP5<sup>IP</sup> – the junction between H89  
100 and H90 of domain V is significantly different compared to the mature mitoribosome (Fig. 1c,  
101 d). Specifically, at the base of H89, one helical turn remains unfolded and instead forms a  
102 flexible loop in the GTPBP5<sup>KO</sup> (Fig. 1d).

103 **MTERF4-NSUN4 complex steers the final steps of 16S rRNA folding and allows for**  
104 **MRM2 binding**

105 The MTERF4-NSUN4 complex, previously shown to be essential for monosome  
106 assembly<sup>16,17</sup>, binds at the intersubunit interface in our GTPBP5<sup>KO</sup> and GTPBP5<sup>IP</sup> structures  
107 (Fig. 1a, b). The C-terminal part of MTERF4 binds to NSUN4 close to the NSUN4 N-  
108 terminus in a mixed hydrophobic-polar binding interface similar to earlier crystal structures of  
109 the isolated complex<sup>18,19</sup> (Fig. 2a). NSUN4 was previously shown to m<sup>5</sup>C-methylate the  
110 C1488 carbon 5 in 12S mt-rRNA<sup>17</sup>. In our structures, the active site of NSUN4 is turned  
111 towards the mt-LSU core (Extended Data Fig. 3a), impeding methylation of the 12S mt-  
112 rRNA. Although the methyl-donor S-adenosyl-methionine (SAM) is observed in the NSUN4  
113 active site, no RNA substrate is present. Furthermore, in the GTPBP5<sup>KO</sup> and GTPBP5<sup>IP</sup>  
114 structures, the MTERF4-NSUN4 complex is bound and bent from two sides by uL2m.  
115 Specifically, a uL2m C-terminal extension penetrates in between NSUN4 and MTERF4 to  
116 further stabilize the MTERF4-NSUN4 binding interface and decreases the curvature of the  
117 MTERF4 solenoid relative to the crystal structures (Fig. 2a). This reforming of the MTERF4  
118 solenoid is necessary to bind the helix-X rRNA region in the strongly positively charged  
119 concave side of MTERF4 (Extended Data Fig. 3b). Here, MTERF4 forms an extensive  
120 network of contacts with helix-X that stabilizes the association and promotes helix-X folding  
121 (Fig. 2b). The mature H71 base-pairing is already formed within helix-X. Thus, by binding to  
122 helix-X, MTERF4 initiates the folding of this 16S mt-rRNA region. Furthermore, it also  
123 exposes the A-loop, which is obstructed by H68, H69, and H71 in the mature mt-LSU (Fig.  
124 1d), thereby allowing MRM2 binding.

125 Similarly to a previously determined mt-LSU assembly intermediate<sup>20</sup> there is a  
126 MALSU1-module positioned adjacent to uL14m in both the GTPBP5<sup>KO</sup> and GTPBP5<sup>IP</sup>  
127 (Fig.1a,b). Furthermore, MTG1 (GTPBP7), which assists in late-stage mt-LSU maturation<sup>21</sup>,  
128 is bound in the vicinity of helix-X (Fig. 1a,b). MTG1 contacts the C-terminus of MALSU1  
129 (Extended Data Fig. 4a) and the region encompassing A2554-U2602 of helix-X. This region  
130 could not be modelled due to the lower local resolution, but the contact is visible in the electron  
131 density map (Extended Data Fig. 4b). Interestingly, the position of human MTG1 in our  
132 structures differs significantly from its bacterial and trypanosomal counterparts<sup>(3,22)</sup>, Extended  
133 Data Fig. 4c). Specifically, while in other systems MTG1 homologs contact the rRNA,  
134 reaching out towards the PTC (Extended Data Fig. 4c), in the trapped intermediates described  
135 here MTG1 is unlikely to induce pronounced conformational changes of the PTC or  
136 participate in the recruitment/dissociation of assembly factors.

137 MRM2 2'-O-methylates U3039 in the 16S A-loop during mt-LSU assembly<sup>23,24</sup> and  
138 in our GTPBP5<sup>KO</sup> and GTPBP5<sup>IP</sup> structures, MRM2 binds in the mt-LSU intersubunit  
139 interface (Fig. 1a,b). It features two N-terminal  $\alpha$ -helices followed by a canonical S-adenosyl-  
140 L-methionine-dependent methyltransferase domain (SAM MTase) (Fig. 2c). In GTPBP5<sup>KO</sup>,  
141 but not in GTPBP5<sup>IP</sup>, the two N-terminal  $\alpha$ -helices extend from MRM2 and insert into the  
142 rRNA core to thereby displace and retrieve the A-loop (16S mt-rRNA domain V) through a  
143 complex interaction network (Fig. 2d,e). This places the 2'-hydroxyl of U3039 close to the  
144 ideal methyl-acceptor position in the MRM2 active site (Fig. 2d). However, there is no  
145 density for either SAM or S-adenosyl homocysteine (SAH) in the MRM2 active site and there  
146 is no apparent density for a 2'-O-methyl on U3039 (Extended Data Fig. 5). Interestingly,  
147 G3040 that is 2'-O-methylated by MRM3<sup>23,24</sup>, is methylated in our structures (Extended Data  
148 Fig. 5). Hence, 2'-O-methylation by MRM3 takes place prior to MRM2 methylation in human  
149 mitoribosome biogenesis.

150

### 151 **GTPBP5 promotes remodelling of the PTC**

152 GTPBP5 consists of a glycine-rich N-terminal domain (Obg-domain) and a C-terminal  
153 GTPase domain (G-domain) (Fig. 3a). In our GTPBP5<sup>IP</sup> structure, the G-domain has GTP in  
154 its active site and is wedged between the L7/L12 stalk and the MALSU1 module (Fig. 1b and  
155 Extended Data Fig. 6a). The Obg-domain protrudes into the PTC (Fig. 3b), thereby displacing  
156 the A-loop from the MRM2 active site and expelling the MRM2 N-terminal  $\alpha$ -helices from  
157 the rRNA core (Fig. 3c), while the A-loop folds into the fully mature position (Fig. 3b3).

158 The protruding Obg-domain is positioned between H89 and H93 and occupies the space that  
159 accommodates the acceptor arm of the A-site tRNA during translation (Extended Data Fig.  
160 6b). Hereby, GTPBP5 adopts a tRNA mimicry strategy, similar to ObgE of *E. coli*<sup>25</sup>. The  
161 Obg-domain contains six glycine-rich sequence motifs that form antiparallel polyproline-II  
162 helices (helices a–f) (Fig. 3b). Helices c and d bind the A-loop, while the loop between  
163 helices e and f inserts into the major groove of H93. The loop between a and b inserts at the  
164 triple-junction formed between H89-H90-H93 (Fig. 3b).

165 Comparison of the GTPBP5<sup>KO</sup> and the GTPBP5<sup>IP</sup> structures with the mature mt-LSU reveals  
166 extensive maturation of the PTC upon GTPBP5 binding. The partly unfolded H89 in the  
167 GTPBP5<sup>KO</sup> is folded in the GTPBP5<sup>IP</sup> (Fig. 3 b1). This folding is coordinated by the joint  
168 action of GTPBP5 and NSUN4: in the presence of GTPBP5, the extended N-terminal region  
169 of NSUN4 inserts into the rRNA core and temporarily displaces the P-loop (Fig. 3 b2),

170 thereby breaking the P-loop interaction with H89 (Fig. 3d). As a consequence, H89 is given  
171 the space necessary to fold into a structure similar to its mature form (Fig. 3 b1, lower).  
172 The GTPBP5<sup>IP</sup> structure shows a rotation of the L7/L12 stalk in comparison to the GTPBP5<sup>KO</sup>  
173 structure (Extended Data Fig. 6c). Here, the rRNA in the L54/L11 region of the stalk forms  $\pi$ -  
174 stacking interactions with two residues of the GTP-ase switch I element of GTPBP5  
175 (Extended Data Fig. 6a,c). Thereby, the L7/L12 stalk stabilizes the “state 2” conformation of  
176 the switch I. In this way, the rotated L7/L12 stalk stabilizes the GTP-state of GTPBP5<sup>26</sup> and  
177 consequently a GTP is bound in our structure (Extended Data Fig. 6a,c). The requirement for  
178 GTPBP5 to be in a GTP-bound state is supported by the inability of a GTPBP5 Walker A  
179 mutant (GTPBP5-S238A) to bind mt-LSU intermediates<sup>8</sup>. A back-rotation of the L7/12 stalk,  
180 presumably by binding of another maturation factor to the mt-LSU assembly intermediate,  
181 would lead to a release of the switch I and the activation of GTP hydrolysis, followed by  
182 release of GTPBP5 from the mt-LSU assembly intermediate. Taken together, GTPBP5 plays  
183 a direct and active role in rRNA remodeling and, together with the NSUN4 N-terminus,  
184 orchestrates the maturation of mitoribosomal PTC.

185

### 186 **Translation elongation factor mtEF-Tu is involved in mitoribosome assembly**

187 mtEF-Tu consists of a GTPase domain (G-domain; domain I) and two structurally  
188 similar  $\beta$ -stranded domains (domains II and III) (Fig. 4a). It was recently shown that during  
189 translation, mtEF-Tu-GTP delivers aminoacylated-tRNA to the mitoribosome in a manner  
190 similar to its bacterial EF-Tu counterparts (Extended Data Fig. 7a,<sup>27</sup>). In contrast, the binding  
191 of an EF-Tu-GTP-aa-tRNA complex is sterically hindered by the MALSU1 module bound in  
192 our mt-LSU intermediates (Extended Data Fig. 7a). Unexpectedly, mtEF-Tu binds to the  
193 mitoribosome in a unique manner in our GTPBP5<sup>IP</sup> structure (Fig. 4b). Here, domains II and  
194 III establish extensive interactions with GTPBP5, the sarcin-ricin loop (SRL) and the  
195 MALSU1 stalk (Fig. 4b,c). In addition, the G-domain switch I element, in its “state 1”/GDP  
196 conformation (Extended Data Fig. 7b), extends and binds MALSU1. Thereby, mtEF-Tu,  
197 together with the SRL and MALSU1, forms a platform for GTPBP5 binding (Fig. 4b). These  
198 structural conclusions are supported by earlier mass-spectrometry data on isolated GTPBP5<sup>IP</sup>  
199 assembly intermediates and protein-proximity interactome analysis<sup>8,28</sup>.

200 The G-domain of mtEF-Tu does not contact the SRL as in mtEF-Tu’s canonical role in  
201 translation but instead binds to the C-terminal region of a bL12m that also contacts uL10m at  
202 the stalk base (Fig. 4b). In bacteria, homologs to bL12m and uL10m, recruit and activate

203 translational GTPases such as EF-Tu via the bL12m C-terminal domain<sup>29,30</sup> and stimulate  
204 GTP hydrolysis 1000-fold<sup>31</sup>. Taken together, this suggests that mtEF-Tu hydrolysis –  
205 stimulated by bL12m and uL10m – is used to accommodate GTPBP5 on the maturing mt-  
206 LSU in analogy to the canonical EF-Tu role in translation, in which aminoacylated-tRNA is  
207 accommodated on the translating ribosome (Extended Data Fig. 7a).

208

## 209 **Concluding remarks**

210 Our analyses shed new light into mammalian mitoribosome maturation and explain  
211 the essential roles of several assembly factors that together promote fine RNA rearrangements  
212 and lead to the mt-LSU completion. Thanks to our approaches that combine biochemical tools  
213 with structural determination, we were able to uncover several features unique to  
214 mammalian mitochondria. Based on these data, we propose a model of the late-stage mt-  
215 LSU assembly that requires the interplay of nine auxiliary factors (Fig. 4d).

216 Lastly, as defects in mitoribosome biogenesis – resulting from, for example, mutations  
217 in MRM2 and GTPBP5 – are increasingly implicated in mitochondrial disease<sup>32,33</sup>, the  
218 current work does not only describe fundamental cellular processes but may also further new  
219 diagnostic and therapeutic approaches to mitochondrial diseases.

220

## 221 **Methods**

222

### 223 **Generation of GTPBP5 knock-out cell line**

224 The knock-out cell line (GTPBP5<sup>KO</sup>) was generated in the Flp-In T-Rex human embryonic  
225 kidney 293 (HEK293T) cell line (Invitrogen) using CRISPR/Cas9 technology targeted on  
226 exon 1 of *MTG2* gene, which encodes for GTPBP5, as described<sup>8</sup>. In short, two pairs of  
227 gRNAs were designed and cloned into the pSpCas9(BB)-2A-Puro (pX459) V2.0 vector to  
228 generate out-of-frame deletions. Transfection of HEK293T cell line with the pX459 variants  
229 was performed using Lipofectamine 3000 following manufacturer's instructions. Selection of  
230 transfected cells was done using puromycin treatment at a final concentration of 1.5 mg/ml  
231 for 48 hours. Subsequently, cells were single-cell diluted and transferred into a 96-well plate.  
232 Selected clones were screened via Sanger sequencing and Western blotting.

233

### 234 **Purification of the mt-LSU from GTPBP5<sup>KO</sup> cell line via sucrose gradient centrifugation**

235 Isolation of mitochondria was performed from GTPBP5<sup>KO</sup> cell line as described in Rorbach *et*  
236 *al.*<sup>24</sup>, with some modifications. Crude mitochondria were further purified via differential

237 centrifugation by being loaded onto a sucrose gradient (1 M and 1.5 M sucrose, 20 mM  
238 Tris-HCl pH 7.5, 1 mM EDTA) and centrifuged at 25000 rpm for 1 hour at 4°C (Beckman  
239 Coulter SW41-Ti rotor). Mitochondria forming a band at the interphase between the 1 M and  
240 1.5 M sucrose were collected and resuspended in 10 mM Tris-HCl pH = 7.5 in 1:1 ratio. After  
241 centrifugation, the final mitochondrial pellet was resuspended in mitochondrial freezing  
242 buffer (200 mM trehalose, 10 mM Tris-HCl pH 7.5, 10 mM KCl, 0.1% BSA, 1 mM  
243 EDTA), snap frozen in liquid nitrogen and stored at -80°C.

244 The mt-LSU was purified from the GTPBP5<sup>KO</sup> cell line via a sucrose gradient centrifugation  
245 experiment. Mitochondria were lysed at 4°C for 20 minutes (25 mM HEPES-KOH pH = 7.5,  
246 20 mM Mg(OAc)<sub>2</sub>, 100 mM KCl, 2% (v/v) Triton X-100, 2 mM dithiothreitol (DTT), 1x  
247 cOmplete EDTA-free protease inhibitor cocktail (Roche), 40 U/μl RNase inhibitor  
248 (Invitrogen)) and later centrifuged at 13000 rpm for 5 minutes at 4°C. For mitoribosome  
249 purification, the mitolysate was subjected to sucrose cushion ultracentrifugation method (0.6  
250 M sucrose, 25 mM HEPES-KOH pH = 7.5, 10 mM Mg(OAc)<sub>2</sub>, 50 mM KCl, 0.5% (v/v)  
251 Triton X-100, 2 mM DTT) by being centrifuged at 73000 rpm for 45 minutes at 4°C  
252 (Beckman Coulter TL120.2 rotor). The mitoribosomal pellet was subsequently resuspended in  
253 ribosome resuspension buffer (25 mM HEPES-KOH pH = 7.5, 10 mM Mg(OAc)<sub>2</sub>, 50 mM  
254 KCl, 0.05% DDM, 2 mM DTT) and centrifuged at 13000 rpm for 10 minutes at 4°C. The  
255 obtained supernatant was then loaded onto a linear sucrose gradient (15-30% (w/v)) in 1x  
256 gradient buffer (25 mM HEPES-KOH pH = 7.5, 10 mM Mg(OAc)<sub>2</sub>, 50 mM KCl, 0.05%  
257 DDM, 2 mM DTT) and centrifuged for 2 hours and 15 minutes at 39000 rpm at 4°C  
258 (Beckman Coulter TLS55 rotor). Fractions corresponding to the large mitochondrial subunit  
259 were collected and subjected to buffer exchange (25 mM HEPES-KOH pH = 7.5, 10 mM  
260 Mg(OAc)<sub>2</sub>, 50 mM KCl) using Vivaspin 500 centrifugal concentrators.

261

## 262 **Generation of a mammalian cell line expressing GTPBP5**

263 A stable mammalian cell line overexpressing C-terminal FLAG-tagged GTPBP5  
264 (GTPBP5::FLAG) in a doxycycline-inducible dose-dependent manner was generated as  
265 described in Cipullo et al.<sup>8</sup>. The GTPBP5 cDNA (hORFeome Database; Internal ID: 12579)  
266 was cloned into pcDNA5/FRT/TO. Flp-In T-Rex human embryonic kidney 293 (HEK293T,  
267 Invitrogen) cells were cultured in DMEM (Dulbecco's modified eagle medium) containing  
268 10% (v/v) tetracycline-free fetal bovine serum (FBS), 2 mM Glutamax (Gibco), 1x  
269 Penicillin/Streptomycin (Gibco), 50 μg/ml uridine, 10 μg/ml Zeocin (Invitrogen) and 100  
270 μg/ml blasticidin (Gibco) at 37 °C under 5% CO<sub>2</sub> atmosphere. Cells were seeded in a 6-well



271 plate, grown in medium without antibiotics and co-transfected with pcDNA5/FRT/TO-  
272 GTPBP5::FLAG and pOG44 using Lipofectamine 3000 according to manufacturer's  
273 recommendations. After 48 hours, selection of cells was promoted by addition of hygromycin  
274 (100 µg/ml, Invitrogen) and blasticidin (100 µg/ml) to culture media. After two to three  
275 weeks post-transfection, single colonies were picked and GTPBP5 overexpression was tested  
276 via Western Blot analysis 48 hours after induction with 50 ng/ml doxycycline.

277

### 278 **Immunoprecipitation experiment**

279 Isolation and purification of mitochondria from GTPBP5::FLAG overexpressing cell line was  
280 performed as described in the above paragraph “Purification of the mt-LSU from GTPBP5<sup>KO</sup>  
281 cell line via sucrose gradient centrifugation”. The mt-LSU bound with GTPBP5 was isolated  
282 via FLAG-immunoprecipitation analysis (IP). Pelleted mitochondria were lysed at 4°C for 20  
283 minutes (25 mM HEPES-KOH pH = 7.5, 20 mM Mg(OAc)<sub>2</sub>, 100 mM KCl, 2% (v/v) Triton  
284 X-100, 0.2 mM DTT, 1x cOmplete EDTA-free protease inhibitor cocktail (Roche), 40 U/µl  
285 RNase inhibitor (Invitrogen)) and centrifuged at 5000g for 5 minutes at 4°C. The supernatant  
286 was then added to ANTI-FLAG M2-Agarose Affinity Gel (Sigma-Aldrich) previously  
287 equilibrated (25 mM HEPES-KOH pH = 7.5, 5 mM Mg(OAc)<sub>2</sub>, 100 mM KCl, 0.05% DDM)  
288 and incubated for 3 hours at 4°C. After incubation, the sample was centrifuged at 5000g for 1  
289 minute at 4°C, the supernatant was removed and the gel was washed three times with wash  
290 buffer. Elution (25 mM HEPES-KOH pH = 7.5, 5 mM Mg(OAc)<sub>2</sub>, 100 mM KCl, 0.05%  
291 DDM, 2 mM DTT) was performed using 3x FLAG Peptide (Sigma-Aldrich) for about 40  
292 minutes at 4°C.

293

### 294 **Cryo-EM data acquisition and image processing**

295 Prior to cryo-EM grid preparation, grids were glow-discharged with 20 mA for 30 seconds  
296 using a PELCO easiGlow glow-discharge unit. Quantifoil Cu 300 mesh (R 2/2 geometry;  
297 Quantifoil Micro Tools GMBH) covered with a thin layer of 3 nm carbon were used for the  
298 for the GTPBP5<sup>KO</sup> sample. Carbon lacey films (400 mesh Cu grid; Agar Scientific) mounted  
299 with ultrathin carbon support film were used for the GTPBP5<sup>IP</sup> sample. Three µl aliquots of  
300 sample were applied to the grids, which were then vitrified in a Vitrobot Mk IV (Thermo  
301 Fisher Scientific) at 4°C and 100% humidity (blot 10 s, blot force 3, 595 filter paper (Ted  
302 Pella Inc.)). Cryo-EM data collection (Extended Data Table 1) was performed with EPU  
303 (Thermo Fisher Scientific) using a Krios G3i transmission-electron microscope (Thermo  
304 Fisher Scientific) operated at 300 kV in the Karolinska Institutet’s 3D-EM facility. Images

305 were acquired in nanoprobe EFTEM SA mode with a slit width of 10 eV using a K3  
306 Bioquantum during 1 second during which 60 movie frames were collected with a flux of  
307  $0.82 \text{ e}^-/\text{\AA}^2$  per frame. Motion correction, CTF-estimation, Fourier binning (to  $1.02 \text{ \AA}/\text{px}$ ),  
308 picking and extraction in 600 pixel boxes (size threshold  $300 \text{ \AA}$ , distance threshold  $20 \text{ \AA}$ ,  
309 using the pretrained BoxNet2Mask\_20180918 model) were performed on the fly using Warp  
310 <sup>34</sup>. Only particles from micrographs with an estimated resolution of  $3.6 \text{ \AA}$  and underfocus  
311 between  $0.2$  and  $3 \text{ \mu m}$  were retained for further processing.

312 For the GTPBP5<sup>KO</sup> dataset, 704720 particles were picked from 37307 micrographs (Extended  
313 Data Fig. 1). The particles were imported into CryoSPARC 2.15 <sup>35</sup> for further processing.  
314 After 2D classification, 130289 particles were selected for an ab-initio reconstruction. This  
315 reconstruction, in addition to two “bad” reconstructions created from bad 2D class-averages,  
316 were used for heterogeneous refinement of the complete particle set resulting in one of the  
317 three classes yielding a large-subunit reconstruction with high resolution features (196318  
318 particles). After homogeneous refinement of these particles, the PDB model of a  
319 mitochondrial LSU assembly intermediate (PDB: 5OOL <sup>20</sup>) was fitted in the density. The  
320 reconstruction contained the MALSU1 module and also featured weak unexplained densities  
321 for several additional components in the intersubunit interface. A 3D variability analysis was  
322 performed with a mask on the intersubunit interface and a low pass resolution of  $10 \text{ \AA}$ , and  
323 subsequently used for clustering into six particle classes representing different assembly  
324 intermediates. Two of the classes (43057 and 41619 particles) lacked the density for the A-  
325 and P-loops, H89, helices 68-71 and the L7/12 stalk. The A- and P-loops become visible in  
326 the third class (28001 particles). The fourth class revealed a number of biogenesis factors:  
327 MRM2, MTERF4-NSUN4, MTG1 and the structured H67-H71 rRNA region (helix-X)  
328 (48646 particles) as well as H89. All the biogenesis factors are absent in the fifth class, in  
329 which helices 68 and 71 move to the mature position (26678 particles). H69 is nevertheless  
330 not visible. The last class contains the small subunit (8317 particles). Non-uniform refinement  
331 of the fourth particle set yielded a reconstruction at  $2.64 \text{ \AA}$ , which was used for model  
332 building and refinement. As the density for MTG1 was weaker than for the other factors, 3D  
333 variability analysis was performed with a mask on the MTG1 region and a  $10 \text{ \AA}$  low-pass  
334 filter to select particles containing MTG1 (19254 particles, which was subsequently subjected  
335 to homogeneous refinement yielding a reconstruction at  $2.90 \text{ \AA}$ ).

336 For the GTPBP5<sup>IP</sup> dataset, 283598 particles were picked from 112076 micrographs using  
337 WARP and imported into CryoSPARC 2.15 (Extended Data Fig. 2) <sup>35</sup>. The complete particle  
338 set was used in heterogeneous refinement against the same three references derived from the

339 GTPBP5<sup>KO</sup> dataset. One of the classes (78306 particles) yielded a high-resolution  
340 reconstruction of the mt-LSU assembly intermediate. After homogeneous refinement,  
341 additional density for GTPBP5 was visible in the intersubunit interface. 3D variability  
342 analysis was performed with a mask on the GTPBP5 region and a low pass resolution of 10  
343 Å. Subsequent clustering into two particle clusters revealed a particle subset containing  
344 GTPBP5 (71834 particles), which was used for model building and refinement. This  
345 reconstruction also features densities for MRM2 and MTERF4-NSUN4. In addition, a weak  
346 density was present for mtEF-TU, the bL12m C-terminal domain and MTG1. The refined  
347 particles were subject to 2D classification and the bad classes were removed. The remaining  
348 particles were polished and refined in Relion 3.1 and re-imported into CryoSPARC for further  
349 processing. 3D variability analysis was performed on these particles with a mask covering  
350 mtEF-TU, bL12m and MTG1 and a 10 Å low pass filter. Subsequent clustering (4 clusters)  
351 revealed 2 clusters containing mtEF-TU/bL12m (17886 particles in total), one cluster  
352 containing MTG1 (8233 particles) and one cluster containing all three proteins (13376  
353 particles). The reconstructions derived from the MTG1- and the mtEF-Tu-containing particles  
354 reached a resolution of 3.19 and 3.21 Å respectively.

355

### 356 **Model building and refinement**

357 Model building of the GTPBP5<sup>KO</sup> and GTPBP5<sup>IP</sup> mt-LSU assembly intermediate structures  
358 was performed using *Coot*<sup>36</sup>. The structure of a previous mt-LSU assembly intermediate  
359 (PDB 5OOL,<sup>20</sup>) was used as a starting model. MRM2 and MTERF4-NSUN4 were identified  
360 by modelling secondary structure elements in *Coot*, and using the initial models for a  
361 structural search using the DALI server<sup>37</sup>. MTG1, as well as mtEF-Tu and the bL12m C-  
362 terminal domain in the GTPBP5-bound mt-LSU dataset, were identified using a density-based  
363 fold-recognition pipeline<sup>20</sup>. Using SWISS-MODEL<sup>38</sup>, we generated homology models for  
364 the human GTPBP5 (template: PDB 4CSU chain 9<sup>25</sup>), MTG1 (template: PDB 3CNL chain A  
365<sup>39</sup>), bL12m (template: PDB 1DD3 chain A<sup>40</sup>) and mtEF-TU (template: PDB 1D2E chain A  
366<sup>41</sup>). All the models, as well as the crystal structure of the human MTERF4-NSUN4 (template:  
367 PDB 4FP9 chains A and B<sup>18</sup>), were fitted into the density map using *Coot* JiggleFit. The  
368 MTG1 GTPase domain and the L17/12 stalk were excluded from atomic refinement and were  
369 only subject to rigid body refinement. Metal ions and modifications were placed based on  
370 map densities. Stereochemical refinement was performed using PHENIX<sup>42</sup>. Refinement  
371 statistics are reported in Extended Data Table 2, while modeled proteins and rRNA are shown

372 in Extended Data Table 3. Validation of the final models was done via MolProbity<sup>43</sup>. Figures  
373 were generated using ChimeraX<sup>44</sup>.

374

## 375 **References**

- 376 1. Hällberg, B. M. & Larsson, N.-G. Making Proteins in the Powerhouse. *Cell Metab.* **20**,  
377 226–240 (2014).
- 378 2. Greber, B. J. *et al.* The complete structure of the 55S mammalian mitochondrial  
379 ribosome. *Science (80-. )*. **348**, 303–308 (2015).
- 380 3. Jaskolowski, M. *et al.* Structural Insights into the Mechanism of Mitoribosomal Large  
381 Subunit Biogenesis. *Mol. Cell* **79**, 629-644.e4 (2020).
- 382 4. Saurer, M. *et al.* Mitoribosomal small subunit biogenesis in trypanosomes involves an  
383 extensive assembly machinery. *Science (80-. )*. **365**, 1144–1149 (2019).
- 384 5. Perez Boerema, A. *et al.* Structure of the chloroplast ribosome with chl-RRF and  
385 hibernation-promoting factor. *Nat. Plants* **4**, 212–217 (2018).
- 386 6. Amunts, A., Brown, A., Toots, J., Scheres, S. H. W. & Ramakrishnan, V. The structure  
387 of the human mitochondrial ribosome. *Science (80-. )*. **348**, 95–98 (2015).
- 388 7. Bogenhagen, D. F., Ostermeyer-Fay, A. G., Haley, J. D. & Garcia-Diaz, M. Kinetics  
389 and Mechanism of Mammalian Mitochondrial Ribosome Assembly. *Cell Rep.* **22**,  
390 1935–1944 (2018).
- 391 8. Cipullo, M. *et al.* Human GTPBP5 is involved in the late stage of mitoribosome large  
392 subunit assembly. *Nucleic Acids Res.* (2020) doi:10.1093/nar/gkaa1131.
- 393 9. Lavdovskaia, E. *et al.* The human Obg protein GTPBP10 is involved in mitoribosomal  
394 biogenesis. *Nucleic Acids Res.* **46**, 8471–8482 (2018).
- 395 10. Maiti, P., Kim, H.-J., Tu, Y.-T. & Barrientos, A. Human GTPBP10 is required for  
396 mitoribosome maturation. *Nucleic Acids Res.* (2018) doi:10.1093/nar/gky938.
- 397 11. Maiti, P., Antonicka, H., Gingras, A.-C., Shoubridge, E. A. & Barrientos, A. Human  
398 GTPBP5 (MTG2) fuels mitoribosome large subunit maturation by facilitating 16S  
399 rRNA methylation. *Nucleic Acids Res.* **48**, 7924–7943 (2020).
- 400 12. Kim, H.-J. & Barrientos, A. MTG1 couples mitoribosome large subunit assembly with  
401 intersubunit bridge formation. *Nucleic Acids Res.* **46**, 8435–8453 (2018).
- 402 13. Lavdovskaia, E. *et al.* Dual function of GTPBP6 in biogenesis and recycling of human  
403 mitochondrial ribosomes. *Nucleic Acids Res.* **48**, 12929–12942 (2020).
- 404 14. Brown, A. *et al.* Structure of the large ribosomal subunit from human mitochondria.  
405 *Science (80-. )*. **346**, 718–722 (2014).

- 406 15. Aibara, S., Singh, V., Modelska, A. & Amunts, A. Structural basis of mitochondrial  
407 translation. *Elife* **9**, (2020).
- 408 16. Cámara, Y. *et al.* MTERF4 Regulates Translation by Targeting the Methyltransferase  
409 NSUN4 to the Mammalian Mitochondrial Ribosome. *Cell Metab.* **13**, 527–539 (2011).
- 410 17. Metodiev, M. D. *et al.* NSUN4 Is a Dual Function Mitochondrial Protein Required for  
411 Both Methylation of 12S rRNA and Coordination of Mitoribosomal Assembly. *PLoS*  
412 *Genet.* **10**, e1004110 (2014).
- 413 18. Spåhr, H., Habermann, B., Gustafsson, C. M., Larsson, N.-G. & Hallberg, B. M.  
414 Structure of the human MTERF4–NSUN4 protein complex that regulates  
415 mitochondrial ribosome biogenesis. *Proc. Natl. Acad. Sci.* **109**, 15253–15258 (2012).
- 416 19. Yakubovskaya, E. *et al.* Structure of the Essential MTERF4:NSUN4 Protein Complex  
417 Reveals How an MTERF Protein Collaborates to Facilitate rRNA Modification.  
418 *Structure* **20**, 1940–1947 (2012).
- 419 20. Brown, A. *et al.* Structures of the human mitochondrial ribosome in native states of  
420 assembly. *Nat. Struct. Mol. Biol.* **24**, 866–869 (2017).
- 421 21. Kim, H. J. & Barrientos, A. MTG1 couples mitoribosome large subunit assembly with  
422 intersubunit bridge formation. *Nucleic Acids Res.* **46**, 8435–8453 (2018).
- 423 22. Seffouh, A. *et al.* Structural consequences of the interaction of RbgA with a 50S  
424 ribosomal subunit assembly intermediate. *Nucleic Acids Res.* **47**, 10414–10425 (2019).
- 425 23. Lee, K. W. & Bogenhagen, D. F. Assignment of 2'-O-methyltransferases to  
426 modification sites on the mammalian mitochondrial large subunit 16 S ribosomal RNA  
427 (rRNA). *J. Biol. Chem.* **289**, 24936–24942 (2014).
- 428 24. Rorbach, J. *et al.* MRM2 and MRM3 are involved in biogenesis of the large subunit of  
429 the mitochondrial ribosome. *Mol. Biol. Cell* **25**, 2542–2555 (2014).
- 430 25. Feng, B. *et al.* Structural and Functional Insights into the Mode of Action of a  
431 Universally Conserved Obg GTPase. *PLoS Biol.* **12**, e1001866 (2014).
- 432 26. Matsumoto, S. *et al.* Molecular Mechanism for Conformational Dynamics of Ras-GTP  
433 Elucidated from In-Situ Structural Transition in Crystal. *Sci. Rep.* **6**, 25931 (2016).
- 434 27. Desai, N. *et al.* Elongational stalling activates mitoribosome-associated quality control.  
435 *Science (80-. ).* **370**, 1105–1110 (2020).
- 436 28. Antonicka, H. *et al.* A High-Density Human Mitochondrial Proximity Interaction  
437 Network. *Cell Metab.* **32**, 479-497.e9 (2020).
- 438 29. Traut, R. R. *et al.* Location and domain structure of Escherichia coli ribosomal protein  
439 L7/L12: site specific cysteine cross-linking and attachment of fluorescent probes.

- 440 *Biochem. Cell Biol.* **73**, 949–958 (1995).
- 441 30. Mustafi, M. & Weisshaar, J. C. Simultaneous Binding of Multiple EF-Tu Copies to  
442 Translating Ribosomes in Live Escherichia coli. *MBio* **9**, (2018).
- 443 31. Diaconu, M. *et al.* Structural Basis for the Function of the Ribosomal L7/12 Stalk in  
444 Factor Binding and GTPase Activation. *Cell* **121**, 991–1004 (2005).
- 445 32. Garone, C. *et al.* Defective mitochondrial rRNA methyltransferase MRM2 causes  
446 MELAS-like clinical syndrome. *Hum. Mol. Genet.* **26**, 4257–4266 (2017).
- 447 33. Solomon, B. D. *et al.* De novo deletion of chromosome 20q13.33 in a patient with  
448 tracheo-esophageal fistula, cardiac defects and genitourinary anomalies implicates  
449 GTPBP5 as a candidate gene. *Birth Defects Res. Part A Clin. Mol. Teratol.* **91**, 862–  
450 865 (2011).
- 451 34. Tegunov, D. & Cramer, P. Real-time cryo-electron microscopy data preprocessing with  
452 Warp. *Nat. Methods* **16**, 1146–1152 (2019).
- 453 35. Punjani, A., Rubinstein, J. L., Fleet, D. J. & Brubaker, M. A. cryoSPARC: algorithms  
454 for rapid unsupervised cryo-EM structure determination. *Nat. Methods* **14**, 290–296  
455 (2017).
- 456 36. Emsley, P., Lohkamp, B., Scott, W. G. & Cowtan, K. Features and development of  
457 Coot. *Acta Crystallogr. Sect. D Biol. Crystallogr.* **66**, 486–501 (2010).
- 458 37. Holm, L. DALI and the persistence of protein shape. *Protein Sci.* **29**, 128–140 (2020).
- 459 38. Arnold, K., Bordoli, L., Kopp, J. & Schwede, T. The SWISS-MODEL workspace: a  
460 web-based environment for protein structure homology modelling. *Bioinformatics* **22**,  
461 195–201 (2006).
- 462 39. Kim, D. J., Jang, J. Y., Yoon, H.-J. & Suh, S. W. Crystal structure of YlqF, a circularly  
463 permuted GTPase: Implications for its GTPase activation in 50 S ribosomal subunit  
464 assembly. *Proteins Struct. Funct. Bioinforma.* **72**, 1363–1370 (2008).
- 465 40. Wahl, M. C., Bourenkov, G. P., Bartunik, H. D. & Huber, R. Flexibility,  
466 conformational diversity and two dimerization modes in complexes of ribosomal  
467 protein L12. *EMBO J.* **19**, 174–186 (2000).
- 468 41. Andersen, G. R., Thirup, S., Spemulli, L. L. & Nyborg, J. High resolution crystal  
469 structure of bovine mitochondrial EF-tu in complex with GDP. *J. Mol. Biol.* **297**, 421–  
470 436 (2000).
- 471 42. Liebschner, D. *et al.* Macromolecular structure determination using X-rays, neutrons  
472 and electrons: recent developments in Phenix. *Acta Crystallogr. Sect. D Struct. Biol.*  
473 **75**, 861–877 (2019).

- 474 43. Chen, V. B. *et al.* MolProbity<sup>□</sup>: all-atom structure validation for macromolecular  
475 crystallography. *Acta Crystallogr. Sect. D Biol. Crystallogr.* **66**, 12–21 (2010).
- 476 44. Goddard, T. D. *et al.* UCSF ChimeraX: Meeting modern challenges in visualization  
477 and analysis. *Protein Sci.* **27**, 14–25 (2018).
- 478 45. Rosenthal, P. B. & Henderson, R. Optimal Determination of Particle Orientation,  
479 Absolute Hand, and Contrast Loss in Single-particle Electron Cryomicroscopy. *J. Mol.*  
480 *Biol.* **333**, 721–745 (2003).
- 481 46. Baker, N. A., Sept, D., Joseph, S., Holst, M. J. & McCammon, J. A. Electrostatics of  
482 nanosystems: Application to microtubules and the ribosome. *Proc. Natl. Acad. Sci.* **98**,  
483 10037–10041 (2001).
- 484 47. Greber, B. J. *et al.* The complete structure of the 55S mammalian mitochondrial  
485 ribosome. *Science (80-. ).* **348**, 303–308 (2015).

486

487

488

489

490

491 **Acknowledgments:** All cryo-EM data used in this work were collected at the Karolinska  
492 Institutet's 3D-EM facility. The SciLifeLab cryo-EM facility (used for grid preparation and  
493 initial screening) is funded by the Knut and Alice Wallenberg, Family Erling Persson, and  
494 Kempe foundations. We acknowledge the support of: Knut and Alice Wallenberg Foundation  
495 (KAW 2018.0080) to B.M.H and J.R.; the Swedish Research Council (2018-3808) to B.M.H.;  
496 Karolinska Institutet and the Max Planck Institute to J.R. J.R. is a Fellow of the Knut and  
497 Alice Wallenberg Foundation (WAF 2017).

498

499 **Author contributions:** M.C. with A.K and J.R. help performed cell biology, biochemistry  
500 and sample preparations; G.V.G. and B.M.H. performed cryo-EM data collection; G.V.G. and  
501 B.M.H. processed data and determined structures; G.V.G. built and refined models with help  
502 from A.K. and B.M.H.; M.C. and G.V.G. wrote the manuscript with input from all authors;  
503 J.R. and B.M.H. oversaw the project and edited the manuscript.

504

505 **Competing interests:** Authors declare no competing interests.

506

507

508

509

510

511



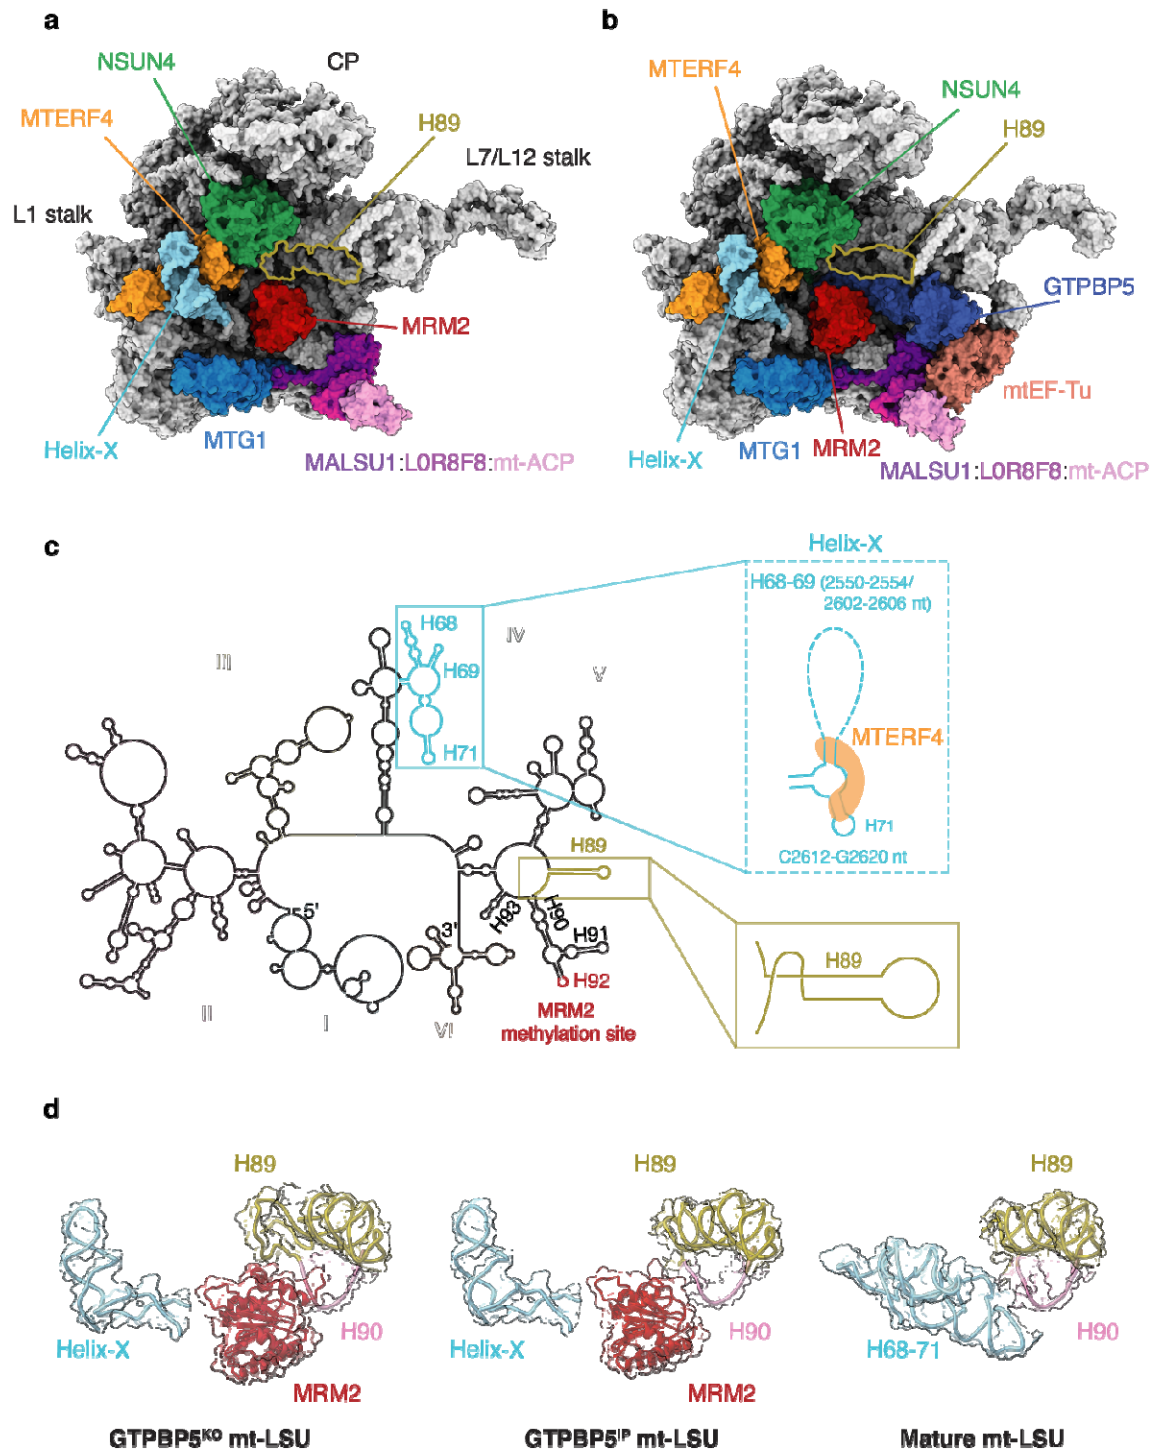

512

513 **Fig. 1: Overview of the GTPBP5<sup>KO</sup> and the GTPBP5<sup>IP</sup> mt-LSU assembly intermediates and comparison**  
 514 **with the mature mt-LSU. a.** The GTPBP5<sup>KO</sup> is bound by MTERF4, NSUN4, MRM2, MTG1 and the MALSU1  
 515 module. Mitoribosomal proteins and 16S mt-rRNA are shown in grey. Helix-X bound to MTERF4 is highlighted  
 516 as well as H89. **b.** The interface of the GTPBP5<sup>IP</sup> mt-LSU intermediate associated with MTERF4, NSUN4,  
 517 MRM2, MTG1, MALSU1:LOR8F8:mt-ACP complex, GTPBP5 and mtEF-Tu. Helix-X bound to MTERF4 is  
 518 shown in light blue. **c.** Secondary structure of the mature mt-LSU 16S mt-rRNA. Differences in the rRNA fold

519 of the GTPBP5<sup>KO</sup> mt-LSU intermediate are shown in the zoomed-in views. Dashed lines indicate regions that are  
520 not modelled. MRM2 methylation site (H92) is indicated in red. The six 16S mt-rRNA domains are shown in  
521 different colours. **d**, Positioning of helix-X (H68-71) and helices H89 and H90 in GTPBP5<sup>KO</sup> mt-LSU (left),  
522 GTPBP5<sup>IP</sup> mt-LSU (middle) and the mature mt-LSU (right) (PDB:6ZSG<sup>15</sup>). In the GTPBP5<sup>KO</sup> and the  
523 GTPBP5<sup>IP</sup> mt-LSU structures MRM2 is present.

524

525

526

527

528

529

530

531

532

533

534

535

536

537

538

539

540

541

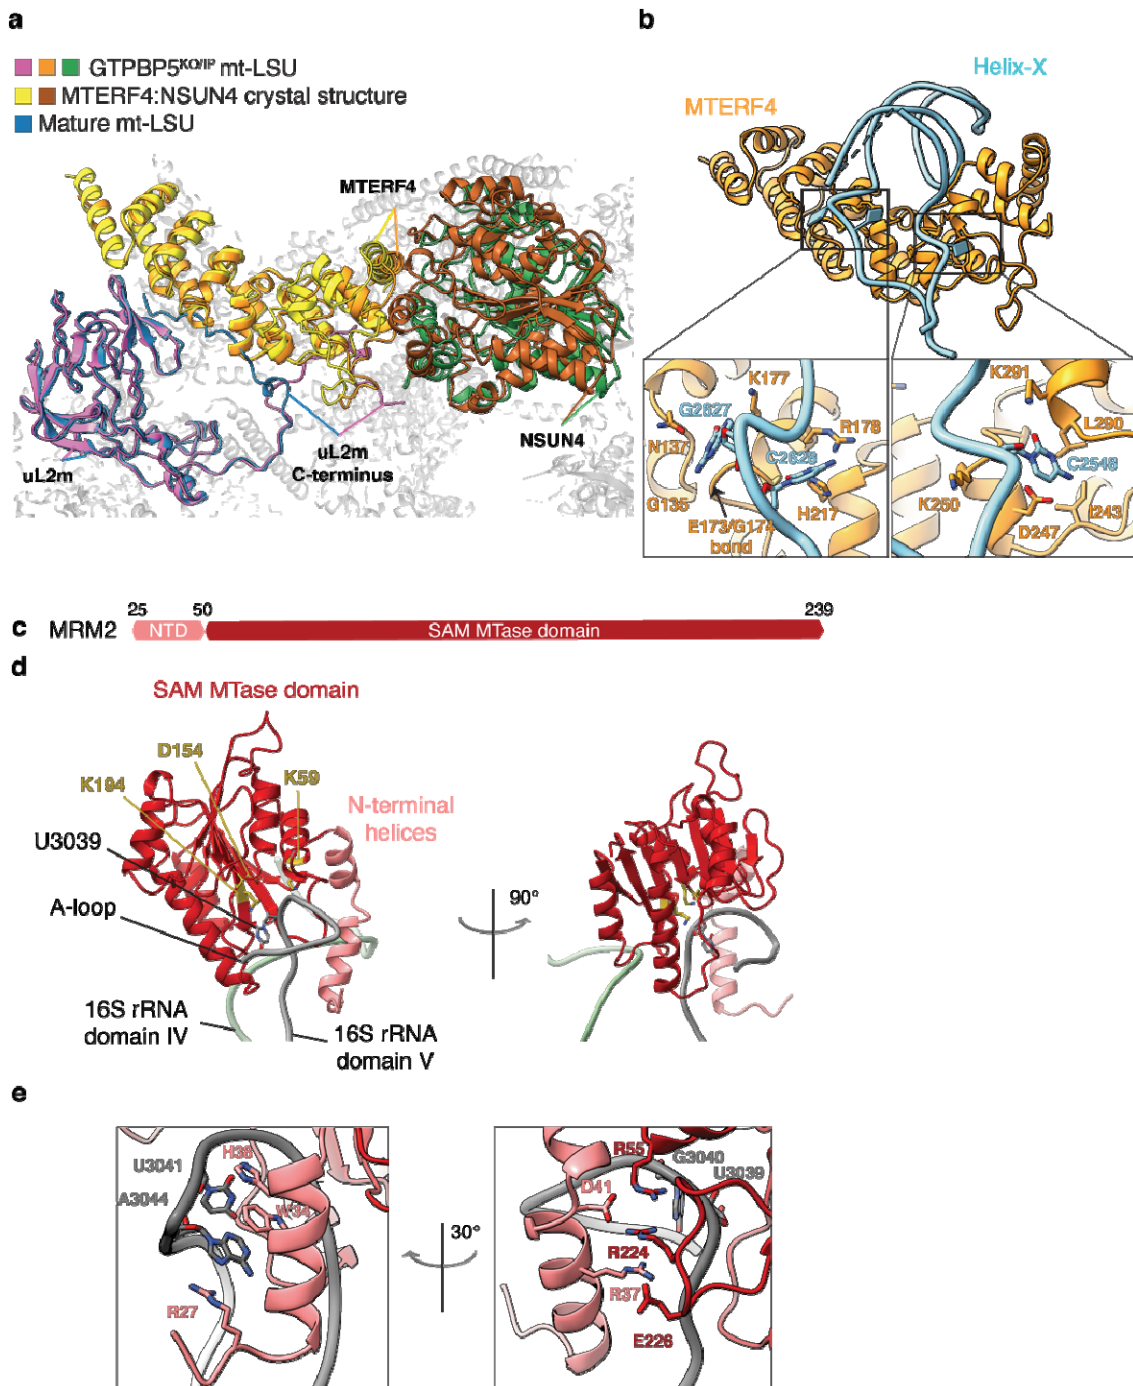

542

543 **Fig. 2: MTERF4-NSUN4 and MRM2 interaction with the mt-LSU assembly intermediates. a**, Comparison  
 544 of the MTERF4-NSUN4 complex bound to the GTPBP5<sup>KO/IP</sup> mt-LSU (orange and green respectively) with the  
 545 MTERF4-NSUN4 crystal structure (PDB: 4FP9<sup>18</sup>) (yellow and brown, respectively), and of uL2m from the  
 546 GTPBP5<sup>KO/IP</sup> mt-LSU (pink) with uL2m from the mature mt-LSU (blue) (PDB: 3J7Y<sup>14</sup>). The uL2m C-terminus  
 547 is indicated in both structures. Helix-X is not shown. **b**, MTERF4-NSUN4 complex bound to helix-X. Zoom-in  
 548 panels show the interactions of MTERF4 with helix-X. **c**, Schematic representation of MRM2 domains (NTD -  
 549 light pink, SAM MTase domain - red). **d**, MRM2 interaction with the domain IV rRNA (nucleotides 2644-2652,  
 550 green) and the A-loop (grey). The MRM2 methylation site (U3039) as well as the catalytic triad of MRM2 (K59,

551 D154, K194) are highlighted as sticks. **e**, Zoomed-in views showing MRM2 interactions with the A-loop in  
 552 different orientations.

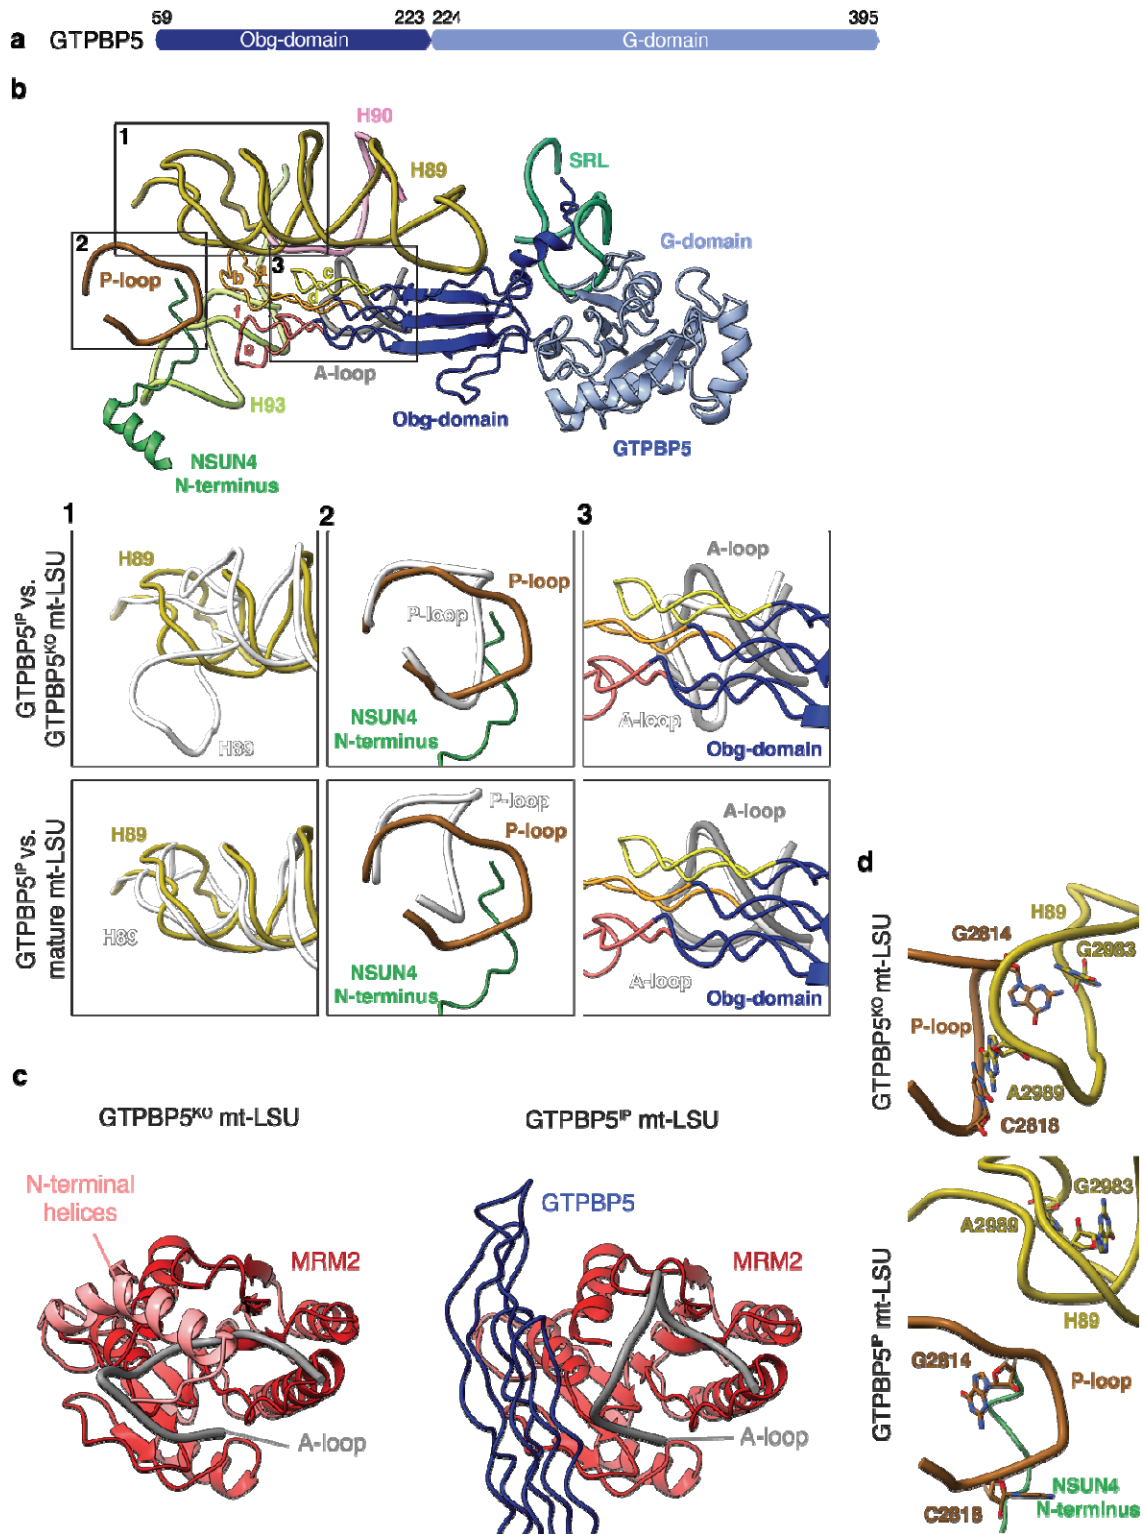

553

554 **Fig. 3: GTPBP5 contributes to the maturation of the PTC region.** **a**, Schematic representation of GTPBP5  
 555 domains (Obg-domain dark blue, G-domain light blue). **b**, Overview of GTPBP5 interactions with the 16S  
 556 rRNA. The Obg-domain (dark blue) contacts helices that are in the PTC region: P-loop, A-loop, H89, H90, H93.

557 Helices a-f of GTPBP5 Obg-domain are indicated. The SRL and the NSUN4 N-terminus are shown. Boxes 1-3  
558 show the remodelling of the PTC in GTPBP5<sup>IP</sup> mt-LSU (in color) compared with GTPBP5<sup>KO</sup> mt-LSU (in white,  
559 higher panel) and with the mature mt-LSU (in white, lower panel) (PDB: 6ZSG<sup>15</sup>). **c**, Comparison of MRM2  
560 (red) and the A-loop (grey) conformations between GTPBP5<sup>KO</sup> mt-LSU (left) and GTPBP5<sup>IP</sup> mt-LSU (right).  
561 The N-terminal helices (pink) of MRM2 could not be modelled in the GTPBP5<sup>IP</sup> mt-LSU. The GTPBP5 Obg-  
562 domain is shown in dark blue. **d**, Comparison of the P-loop and H89 conformations between GTPBP5<sup>IP</sup> mt-LSU  
563 (lower panel) and GTPBP5<sup>KO</sup> mt-LSU structures (higher panel).

564

565

566

567

568

569

570

571

572

573

574

575

576

577

578

579

580

581

582

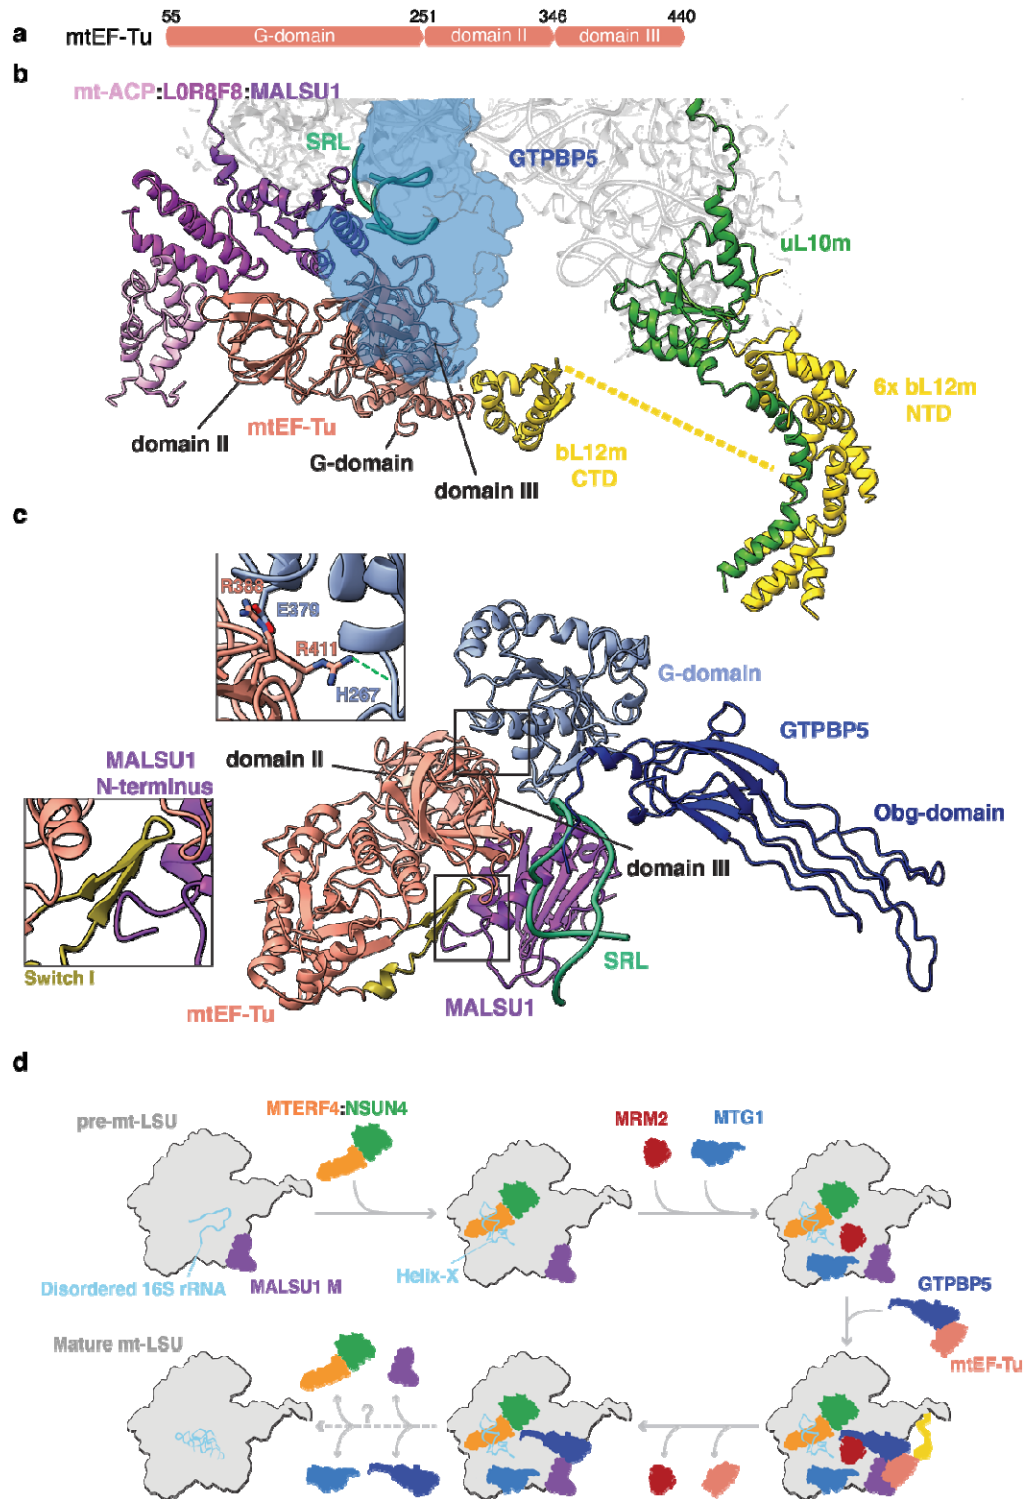

**Fig. 4: Interaction of mtEF-Tu with the mt-LSU assembly intermediate and model of the final steps of mt-LSU biogenesis. a**, Schematic representation of mtEF-Tu domains. **b**, mtEF-Tu interaction with GTPBP5, the MALSU1 module and the bL12m C-terminal domain. mtEF-Tu G-domain, domain II and domain III and the SRL are indicated. The six copies of bL12m N-terminal domain and uL10m are also highlighted. The yellow

589 dashed line indicates a hypothetical connection between bL12m CTD and one of the six copies of bL12m NTD,  
590 not visible in the structure. **c**, Representation of the mtEF-Tu interaction with GTPBP5 and MALSU1. The upper  
591 zoomed-in panel features interactions between the GTPBP5 G-domain and the mtEF-Tu domain III. The green  
592 dashed line indicates interactions to the RNA phosphate backbone. The lower zoomed-in panel shows the mtEF-  
593 Tu switch I interaction with MALSU1. **d**, Final steps of the mt-LSU assembly. The dashed arrow indicates that  
594 biogenesis factors are released in an unknown order.

595

596
